# Supplementary material
Source: publisher figshare collection journal article supplement (https://diabetesjournals.figshare.com/articles/dataset/_/28283450)
Supplement: Supplementary file 1 [file 1]

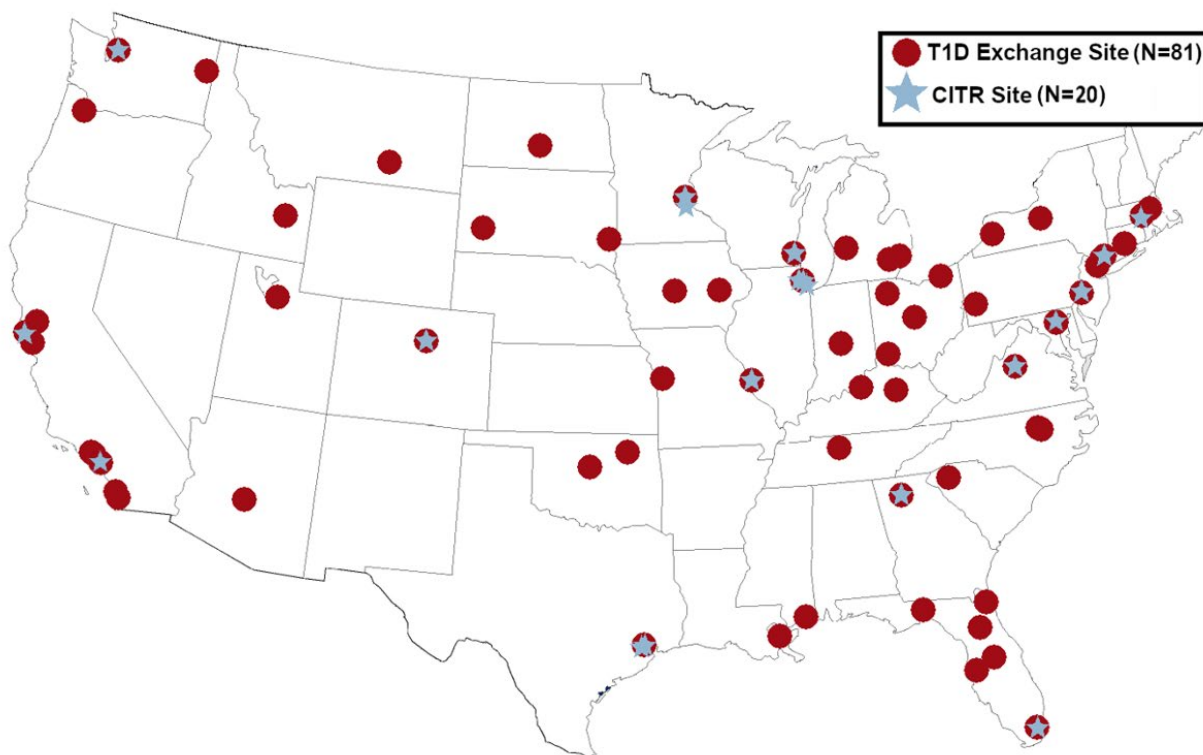

**Supplementary Exhibit 1**—Geographic distribution of T1D Exchange Clinic Network and CTR sites whose registrants contributed to the comparative analysis. T1D, type 1 diabetes; CTR, Collaborative Islet Transplant Registry.
