# Supplementary material
Source: publisher figshare collection journal article supplement (https://diabetesjournals.figshare.com/articles/dataset/_/28283450)
Supplement: Supplementary file 2 [file 1]

**A**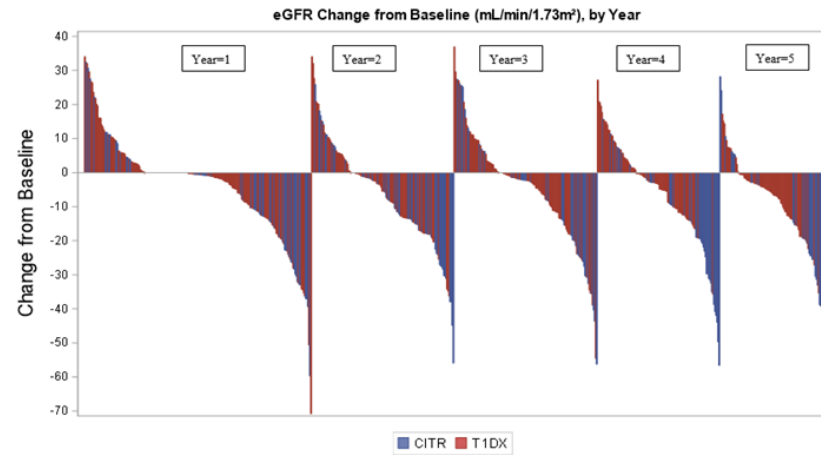**B**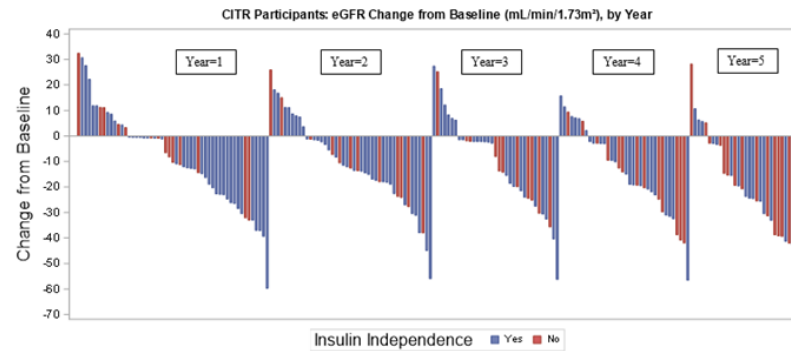**C**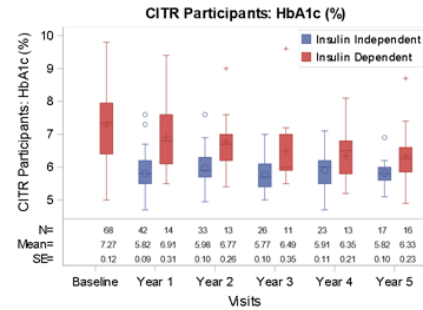**D**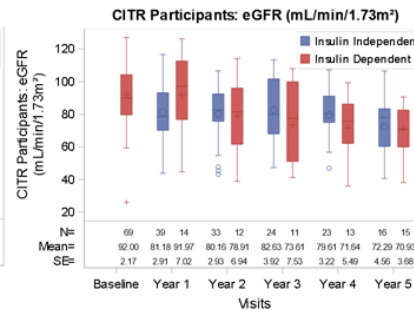

**Supplementary Exhibit 5**—Waterfall plot illustrating the change in eGFR (A) over time and by study cohort and (B) for the CITR cohort, over time and by insulin independence status; as well as boxplots for CITR participants by insulin independence status for (C) HbA<sub>1c</sub> and (D) eGFR. eGFR, estimated glomerular filtration rate; CITR, Collaborative Islet Transplant Registry cohort; T1DX, T1D Exchange Registry cohort.
