# Supplementary material
Source: publisher figshare collection journal article supplement (https://diabetesjournals.figshare.com/articles/dataset/_/28283450)
Supplement: Supplementary file 4 [file 1]

### Supplementary Exhibit 3: CONSORT Flow Diagram

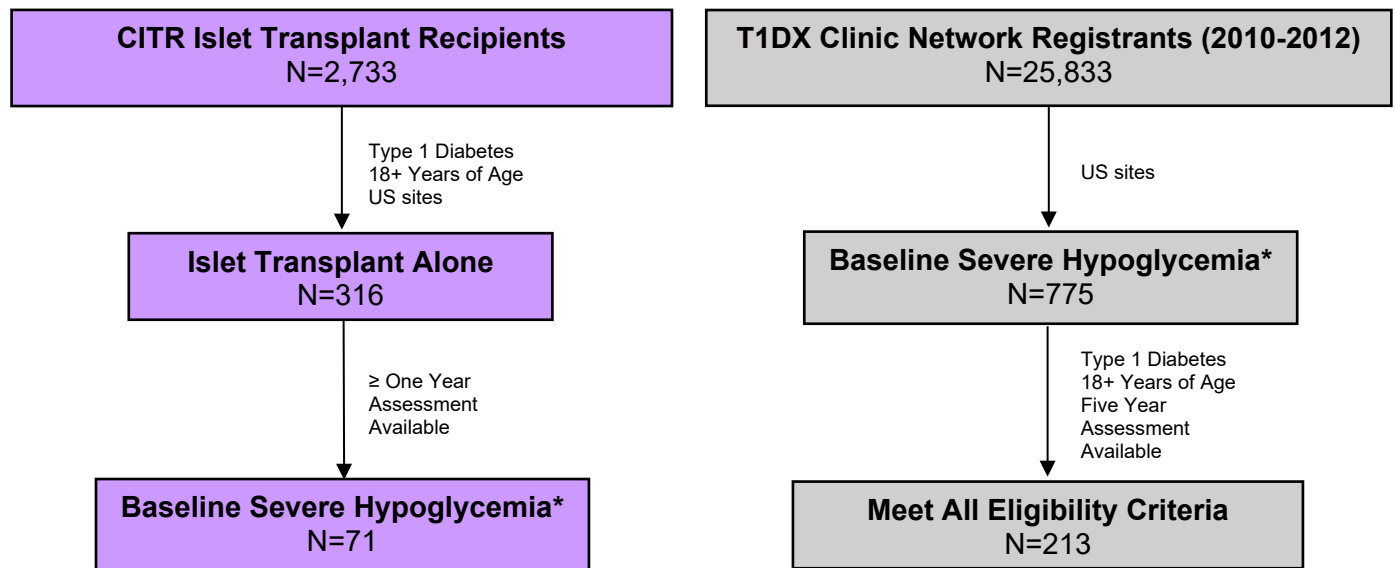

\*Defined by the presence of seizure or loss-of-consciousness, and occurring in the year prior to enrollment in either registry.
