# Supplementary material
Source: publisher figshare collection journal article supplement (https://diabetesjournals.figshare.com/articles/dataset/_/28283450)
Supplement: Supplementary file 5 [file 1]

## **Supplementary Exhibit 6**

The 71 CITR participants included in this analysis are reported from the following clinical centers: University of Minnesota, University of Miami, Baylor College of Medicine/The Methodist Hospital, City of Hope, the NIH Clinical Transplant Center, University of Virginia, Emory Transplant Center, University of Massachusetts Memorial Health Care, Washington University St. Louis, University of Pennsylvania, Northwestern University, University of Chicago, University of Colorado Health Sciences Center, Benaroya Research Institute, Mayo Clinic, University of California San Francisco, Weill Cornell Medical College, University of Wisconsin, University of Illinois Chicago, and Baylor Regional Transplant Institute.
