# Supplementary material
Source: publisher figshare collection journal article supplement (https://diabetesjournals.figshare.com/articles/dataset/_/28283450)
Supplement: Supplementary file 6 [file 1]

| Supplementary Exhibit 4. Listing of subjects who experienced at least 1 SHE with Seizure or Loss of Consciousness Post-Baseline |                                                                                   |                                                                             |                    |                                       |
|---------------------------------------------------------------------------------------------------------------------------------|-----------------------------------------------------------------------------------|-----------------------------------------------------------------------------|--------------------|---------------------------------------|
| Subject ID                                                                                                                      | Year of Follow-Up During which SHE with Seizure or Loss of Consciousness Occurred | # of Episodes of SHE with Seizure or Loss of Consciousness During that Year | Insulin Dependent? | Concurrent Fasting C-peptide (nmol/L) |
| CITR Recipient A                                                                                                                | 2                                                                                 | 5                                                                           | Yes                | 0.0                                   |
|                                                                                                                                 | 4                                                                                 | 2                                                                           | Yes                | 0.0                                   |
|                                                                                                                                 | 5                                                                                 | 2                                                                           | Yes                | 0.0                                   |
| CITR Recipient B                                                                                                                | 5                                                                                 | 1                                                                           | Yes                | 0.2                                   |
| CITR Recipient C                                                                                                                | 4                                                                                 | 2                                                                           | Yes                | 0.4                                   |
| CITR Recipient D                                                                                                                | 4                                                                                 | 3                                                                           | Yes                | 0.0                                   |
| CITR Recipient E                                                                                                                | 1                                                                                 | 1                                                                           | Yes                | 0.0                                   |
| CITR Recipient F                                                                                                                | 4                                                                                 | 1                                                                           | Yes                | 0.0                                   |
| T1DX Subject 1                                                                                                                  | 1                                                                                 | 2                                                                           | Yes                | Unknown                               |
| T1DX Subject 2                                                                                                                  | 1                                                                                 | 2                                                                           | Yes                | Unknown                               |
| T1DX Subject 3                                                                                                                  | 3                                                                                 | 1                                                                           | Yes                | Unknown                               |
| T1DX Subject 4                                                                                                                  | 1                                                                                 | 5                                                                           | Yes                | Unknown                               |
| T1DX Subject 5                                                                                                                  | 2                                                                                 | 1                                                                           | Yes                | Unknown                               |
|                                                                                                                                 | 3                                                                                 | 1                                                                           | Yes                | Unknown                               |
| T1DX Subject 6                                                                                                                  | 1                                                                                 | 1                                                                           | Yes                | Unknown                               |
| T1DX Subject 7                                                                                                                  | 3                                                                                 | 1                                                                           | Yes                | Unknown                               |
| T1DX Subject 8                                                                                                                  | 1                                                                                 | 1                                                                           | Yes                | Unknown                               |
| T1DX Subject 9                                                                                                                  | 2                                                                                 | 3                                                                           | Yes                | Unknown                               |
| T1DX Subject 10                                                                                                                 | 1                                                                                 | 1                                                                           | Yes                | Unknown                               |
|                                                                                                                                 | 3                                                                                 | 1                                                                           | Yes                | Unknown                               |
| T1DX Subject 11                                                                                                                 | 1                                                                                 | 1                                                                           | Yes                | Unknown                               |
|                                                                                                                                 | 2                                                                                 | 1                                                                           | Yes                | Unknown                               |
| T1DX Subject 12                                                                                                                 | 4                                                                                 | 1                                                                           | Yes                | Unknown                               |
| T1DX Subject 13                                                                                                                 | 1                                                                                 | 1                                                                           | Yes                | Unknown                               |
|                                                                                                                                 | 3                                                                                 | 1                                                                           | Yes                | Unknown                               |
| T1DX Subject 14                                                                                                                 | 1                                                                                 | 1                                                                           | Yes                | Unknown                               |
| T1DX Subject 15                                                                                                                 | 1                                                                                 | 1                                                                           | Yes                | Unknown                               |
| T1DX Subject 16                                                                                                                 | 1                                                                                 | 1                                                                           | Yes                | Unknown                               |
| T1DX Subject 17                                                                                                                 | 1                                                                                 | 4                                                                           | Yes                | Unknown                               |
| T1DX Subject 18                                                                                                                 | 1                                                                                 | 1                                                                           | Yes                | Unknown                               |
| T1DX Subject 19                                                                                                                 | 1                                                                                 | 1                                                                           | Yes                | Unknown                               |
|                                                                                                                                 | 2                                                                                 | 1                                                                           | Yes                | Unknown                               |
| T1DX Subject 20                                                                                                                 | 2                                                                                 | 1                                                                           | Yes                | Unknown                               |
| T1DX Subject 21                                                                                                                 | 1                                                                                 | 2                                                                           | Yes                | Unknown                               |
| T1DX Subject 22                                                                                                                 | 4                                                                                 | 1                                                                           | Yes                | Unknown                               |
| T1DX Subject 23                                                                                                                 | 2                                                                                 | 1                                                                           | Yes                | Unknown                               |
| T1DX Subject 24                                                                                                                 | 5                                                                                 | 1                                                                           | Yes                | Unknown                               |
| T1DX Subject 25                                                                                                                 | 1                                                                                 | 5                                                                           | Yes                | Unknown                               |
| T1DX Subject 26                                                                                                                 | 1                                                                                 | 4                                                                           | Yes                | Unknown                               |
|                                                                                                                                 | 3                                                                                 | 1                                                                           | Yes                | Unknown                               |
| T1DX Subject 27                                                                                                                 | 3                                                                                 | 1                                                                           | Yes                | Unknown                               |
| T1DX Subject 28                                                                                                                 | 1                                                                                 | 1                                                                           | Yes                | Unknown                               |
| T1DX Subject 29                                                                                                                 | 2                                                                                 | 1                                                                           | Yes                | Unknown                               |
| T1DX Subject 30                                                                                                                 | 1                                                                                 | 5                                                                           | Yes                | Unknown                               |
| T1DX Subject 31                                                                                                                 | 1                                                                                 | 1                                                                           | Yes                | Unknown                               |
|                                                                                                                                 | 3                                                                                 | 1                                                                           | Yes                | Unknown                               |
| T1DX Subject 32                                                                                                                 | 1                                                                                 | 2                                                                           | Yes                | Unknown                               |
| T1DX Subject 33                                                                                                                 | 5                                                                                 | 1                                                                           | Yes                | Unknown                               |
| T1DX Subject 34                                                                                                                 | 3                                                                                 | 1                                                                           | Yes                | Unknown                               |
|                                                                                                                                 | 5                                                                                 | 2                                                                           | Yes                | Unknown                               |
| T1DX Subject 35                                                                                                                 | 1                                                                                 | 5                                                                           | Yes                | Unknown                               |
| T1DX Subject 36                                                                                                                 | 1                                                                                 | 2                                                                           | Yes                | Unknown                               |
| T1DX Subject 37                                                                                                                 | 3                                                                                 | 1                                                                           | Yes                | Unknown                               |
| T1DX Subject 38                                                                                                                 | 1                                                                                 | 1                                                                           | Yes                | Unknown                               |
| T1DX Subject 39                                                                                                                 | 4                                                                                 | 1                                                                           | Yes                | Unknown                               |
| T1DX Subject 40                                                                                                                 | 1                                                                                 | 1                                                                           | Yes                | Unknown                               |
| T1DX Subject 41                                                                                                                 | 1                                                                                 | 1                                                                           | Yes                | Unknown                               |
|                                                                                                                                 | 2                                                                                 | 1                                                                           | Yes                | Unknown                               |
| T1DX Subject 42                                                                                                                 | 1                                                                                 | 2                                                                           | Yes                | Unknown                               |
| T1DX Subject 43                                                                                                                 | 1                                                                                 | 3                                                                           | Yes                | Unknown                               |
|                                                                                                                                 | 3                                                                                 | 1                                                                           | Yes                | Unknown                               |
| T1DX Subject 44                                                                                                                 | 2                                                                                 | 1                                                                           | Yes                | Unknown                               |
|                                                                                                                                 | 3                                                                                 | 2                                                                           | Yes                | Unknown                               |
| T1DX Subject 45                                                                                                                 | 1                                                                                 | 2                                                                           | Yes                | Unknown                               |
|                                                                                                                                 | 3                                                                                 | 3                                                                           | Yes                | Unknown                               |
|                                                                                                                                 | 5                                                                                 | 1                                                                           | Yes                | Unknown                               |
| T1DX Subject 46                                                                                                                 | 1                                                                                 | 1                                                                           | Yes                | Unknown                               |
|                                                                                                                                 | 4                                                                                 | 1                                                                           | Yes                | Unknown                               |
